# Supplementary material for: The Preliminary Research on Shifts in Maize Rhizosphere Soil Microbial Communities and Symbiotic Networks under Different Fertilizer Sources
Source: MDPI journal article supplement (doi:10.3390/agronomy13082111), 2023-08-11
Supplement: s1 [file s1]

# The Preliminary Research on Shifts in Maize Rhizosphere Soil Microbial Communities and Symbiotic Networks under Different Fertilizer Sources

Lidong Ji <sup>1,2</sup>, Xing Xu <sup>1,\*</sup>, Fengju Zhang <sup>1</sup>, Haili Si <sup>2</sup>, Lei Li <sup>1</sup> and Guilian Mao <sup>1</sup>

<sup>1</sup> School of Agriculture, Ningxia University, Yinchuan 750021, China

<sup>2</sup> Institute of Agricultural Resources and Environment, Ningxia Academy of Agriculture and Forestry Sciences, Yinchuan 750002, China

\* Correspondence: xuxingscience@126.com

## Lists of tables and figures:

**Table S1.** The differences in the bacterial and fungal community structures among soil samples.

**Table S2.** The relative abundance of phyla and genera (top 10) for bacteria.

**Table S3.** The relative abundance of phyla and genera (top 10) for fungi.

**Table S4.** The results of Monte Carlo permutation test in the RDA in the vegan package of R.

**Figure S1.** The geographical location of the experimental field.

**Figure S2.** Rarefaction curves of bacteria (a) and fungi (b).

**Figure S3.** Comparison of microbial diversity indices among all four fertilization treatments.

**Figure S4.** Shared and unique OTUs in all fertilization treatments for bacteria (a) and fungi (b).

**Figure S5.** Results of LEfSe analysis showing bacterial taxa that significantly differed in the four treatments (a). Cladogram plotted from LEfSe analysis showing the significant differences ( $p < 0.05$ ) in relative abundance of bacterial taxon among four fertilization treatments (b).

**Figure S6.** Results of LEfSe analysis showing fungal taxa that significantly differed in the four treatments (a). Cladogram plotted from LEfSe analysis showing the significant differences ( $p < 0.05$ ) in relative abundance of fungal taxon among four fertilization treatments (b).

CK (without any treatments), NPK (with only mineral NPK fertilizer (360 kg N ha<sup>-1</sup>, 120 kg P<sub>2</sub>O<sub>5</sub> ha<sup>-1</sup>, and 45 kg K<sub>2</sub>O ha<sup>-1</sup>)), OF (with only organic fertilizer 9000 kg ha<sup>-1</sup>), and NPK+OF (mineral NPK fertilizer with organic fertilizer).

**Table S1.** The differences in the bacterial and fungal community structures among samples. The results were analyzed using ANOSIM analysis.  $p$ -value  $< 0.05$  (\*) and  $p$ -value  $< 0.01$  (\*\*) represent the significant difference between the two treatments. CK indicates without any treatments, NPK indicates NPK fertilizer treatment, OF indicates organic fertilizer treatment, NPK+OF indicates treatment of NPK fertilizer combined with organic fertilizer.

| Group      | Bacteria    |            | Fungi       |            |
|------------|-------------|------------|-------------|------------|
|            | R statistic | $p$ -value | R statistic | $p$ -value |
| CK-NPK     | 1.0000      | 0.107      | 1.0000      | 0.103      |
| CK-OF      | 1.0000      | 0.101      | 0.6667      | 0.110      |
| CK-NPK+OF  | 0.7778      | 0.104      | 1.0000      | 0.099      |
| NPK-OF     | 1.0000      | 0.108      | 1.0000      | 0.106      |
| NPK-NPK+OF | 0.2222      | 0.318      | 1.0000      | 0.099      |
| OF-NPK+OF  | 0.5185      | 0.187      | 1.0000      | 0.101      |
| all        | 0.6975      | 0.001**    | 0.8704      | 0.001**    |

**Table S2.** The relative abundance of phyla and genera (top 10) for bacteria. The asterisk (\*) follows the taxonomic name represents significant differences ( $p < 0.05$ ) among the four treatments, respectively.

| Classification level | Top 10 bacteria           | Relative abundance |        |        |        |
|----------------------|---------------------------|--------------------|--------|--------|--------|
|                      |                           | CK                 | NPK    | OF     | NPK+OF |
| Phylum               | Proteobacteria*           | 0.2715             | 0.2224 | 0.2253 | 0.2066 |
|                      | Acidobacteriota*          | 0.0917             | 0.1490 | 0.1348 | 0.1504 |
|                      | Gemmatimonadota*          | 0.0682             | 0.1174 | 0.1116 | 0.1084 |
|                      | Actinobacteriota          | 0.1055             | 0.0873 | 0.0949 | 0.1012 |
|                      | Chloroflexi               | 0.1014             | 0.0917 | 0.0933 | 0.0834 |
|                      | Planctomycetota           | 0.0758             | 0.0803 | 0.0835 | 0.0700 |
|                      | Bacteroidota*             | 0.0712             | 0.0514 | 0.0614 | 0.0855 |
|                      | Myxococcota               | 0.0502             | 0.0453 | 0.0440 | 0.0438 |
|                      | Crenarchaeota             | 0.0288             | 0.0337 | 0.0300 | 0.0311 |
|                      | Desulfobacterota*         | 0.0426             | 0.0276 | 0.0284 | 0.0243 |
| Genus                | <i>MNDI</i> *             | 0.0246             | 0.0200 | 0.0227 | 0.0241 |
|                      | <i>RB41</i> *             | 0.0111             | 0.0208 | 0.0224 | 0.0219 |
|                      | <i>Pseudomonas</i>        | 0.0124             | 0.0267 | 0.0107 | 0.0179 |
|                      | <i>Haliangium</i>         | 0.0118             | 0.0129 | 0.0122 | 0.0119 |
|                      | <i>Citri fermentans</i> * | 0.0143             | 0.0100 | 0.0094 | 0.0076 |
|                      | <i>Metagenome</i> *       | 0.0096             | 0.0095 | 0.0104 | 0.0078 |
|                      | <i>Subgroup_10</i> *      | 0.0081             | 0.0086 | 0.0077 | 0.0119 |
|                      | <i>Lysobacter</i> *       | 0.0112             | 0.0076 | 0.0074 | 0.0085 |
|                      | <i>Sphingomonas</i> *     | 0.0097             | 0.0080 | 0.0100 | 0.0062 |
|                      | <i>Defluviicoccus</i>     | 0.0115             | 0.0063 | 0.0093 | 0.0048 |

**Table S3.** The relative abundance of phyla and genera (top 10) for bacteria. The asterisk (\*) follows the taxonomic name represents significant differences ( $p < 0.05$ ) among the four treatments, respectively.

| Classification level | Top 10 fungi              | Relative abundance |        |        |        |
|----------------------|---------------------------|--------------------|--------|--------|--------|
|                      |                           | CK                 | NPK    | OF     | NPK+OF |
| Phylum               | Ascomycota*               | 0.6118             | 0.5464 | 0.4849 | 0.6549 |
|                      | Basidiomycota*            | 0.0335             | 0.1076 | 0.0735 | 0.0592 |
|                      | Mortierellomycota         | 0.0692             | 0.0534 | 0.0429 | 0.0555 |
|                      | Glomeromycota             | 0.0227             | 0.0086 | 0.0184 | 0.0212 |
|                      | Chytridiomycota           | 0.0227             | 0.0177 | 0.0101 | 0.0113 |
|                      | Blastocladiomycota        | 0.0001             | 0.0002 | 0.0008 | 0.0000 |
|                      | Rozellomycota             | 0.0001             | 0.0003 | 0.0001 | 0.0003 |
|                      | Olpidiomycota             | 0.0000             | 0.0002 | 0.0000 | 0.0004 |
|                      | Kickxellomycota           | 0.0002             | 0.0000 | 0.0003 | 0.0001 |
|                      | Zoopagomycota             | 0.0002             | 0.0001 | 0.0000 | 0.0001 |
| Genus                | <i>Botryotrichum</i>      | 0.2692             | 0.1328 | 0.1895 | 0.1950 |
|                      | <i>Mortierella</i>        | 0.0691             | 0.0531 | 0.0428 | 0.0554 |
|                      | <i>Fusarium</i> *         | 0.0186             | 0.0724 | 0.0193 | 0.0138 |
|                      | <i>Acremonium</i> *       | 0.0821             | 0.0098 | 0.0086 | 0.0058 |
|                      | <i>Chaetomium</i>         | 0.0187             | 0.0136 | 0.0139 | 0.0364 |
|                      | <i>Clitocybe</i> *        | 0.0036             | 0.0005 | 0.0252 | 0.0080 |
|                      | <i>Neopaxillus</i> *      | 0.0073             | 0.0284 | 0.0001 | 0.0003 |
|                      | <i>Stachybotrys</i> *     | 0.0058             | 0.0137 | 0.0081 | 0.0070 |
|                      | <i>Lophotrichus</i>       | 0.0210             | 0.0018 | 0.0046 | 0.0009 |
|                      | <i>Plectosphaerella</i> * | 0.0190             | 0.0023 | 0.0038 | 0.0008 |

**Table S4.** The results of Monte Carlo permutation test in the RDA in the vegan package of R.  $r^2$  represents the coefficients of determination of soil properties that were related to OTUs. \* $p < 0.05$ , \*\* $p < 0.01$ , \*\*\* $p < 0.001$ . Soil organic matter (OM), total N (TN), total P (TP), total K (TK), dissolved organic C (AN), available P (AP), available K (AK).

| <b>Bacteria</b>                  |          |          |        |            |
|----------------------------------|----------|----------|--------|------------|
| <b>Test: F= 1.4835, 0.004 **</b> |          |          |        |            |
| Soil properties                  | RDA1     | RDA2     | $r^2$  | $p$ -value |
| OM                               | 0.76694  | -0.64172 | 0.9196 | 0.001 ***  |
| TN                               | 0.49292  | -0.87007 | 0.6166 | 0.011 *    |
| TP                               | 0.37449  | -0.92723 | 0.2551 | 0.266      |
| TK                               | -0.94021 | 0.34059  | 0.1833 | 0.411      |
| AN                               | 0.59796  | -0.80153 | 0.9478 | 0.001 ***  |
| AP                               | 0.47998  | -0.87728 | 0.8926 | 0.003 **   |
| AK                               | -0.27171 | -0.96238 | 0.7909 | 0.004 **   |
| <b>Fungi</b>                     |          |          |        |            |
| <b>Test: F= 2.7082, 0.002 **</b> |          |          |        |            |
| Soil properties                  | RDA1     | RDA2     | $r^2$  | $p$ -value |
| OM                               | 0.90045  | -0.43495 | 0.5958 | 0.018 *    |
| TN                               | 0.65143  | -0.75871 | 0.3091 | 0.184      |
| TP                               | 0.56482  | -0.82521 | 0.4734 | 0.062      |
| TK                               | -0.96626 | -0.25758 | 0.0611 | 0.774      |
| AN                               | 0.73856  | -0.67418 | 0.6279 | 0.020 *    |
| AP                               | 0.60415  | -0.79687 | 0.6951 | 0.007 **   |
| AK                               | -0.37200 | -0.92823 | 0.5504 | 0.031 *    |

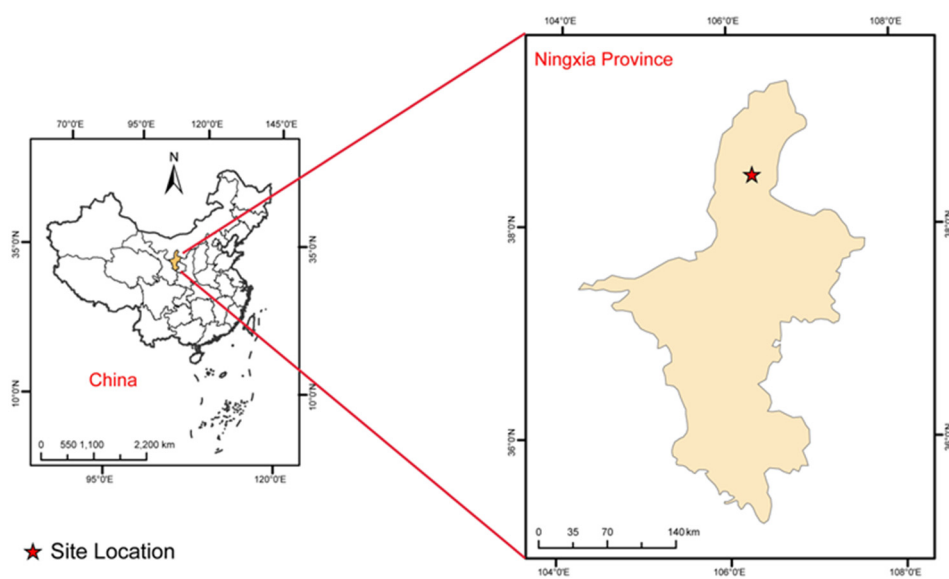

**Figure S1.** The geographical location of the experimental field.

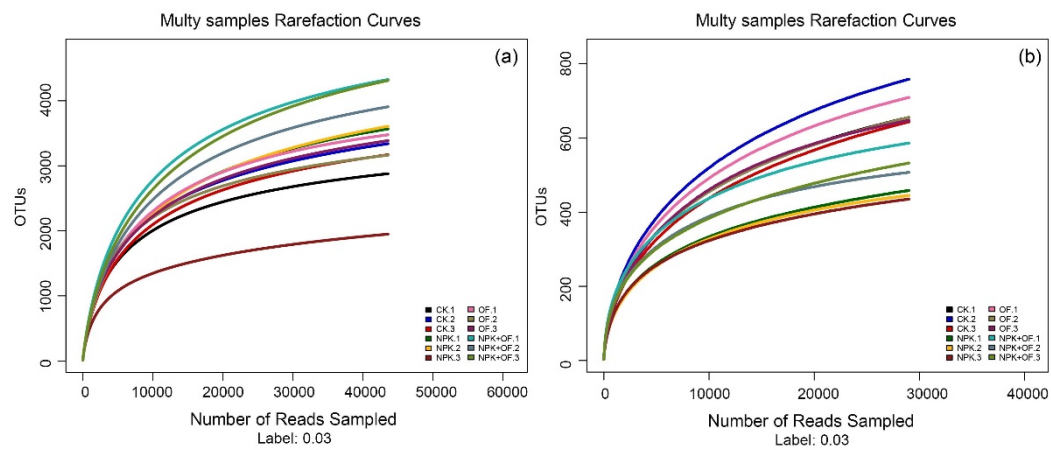

**Figure S2.** Rarefaction curves of bacteria (a) and fungi (b).



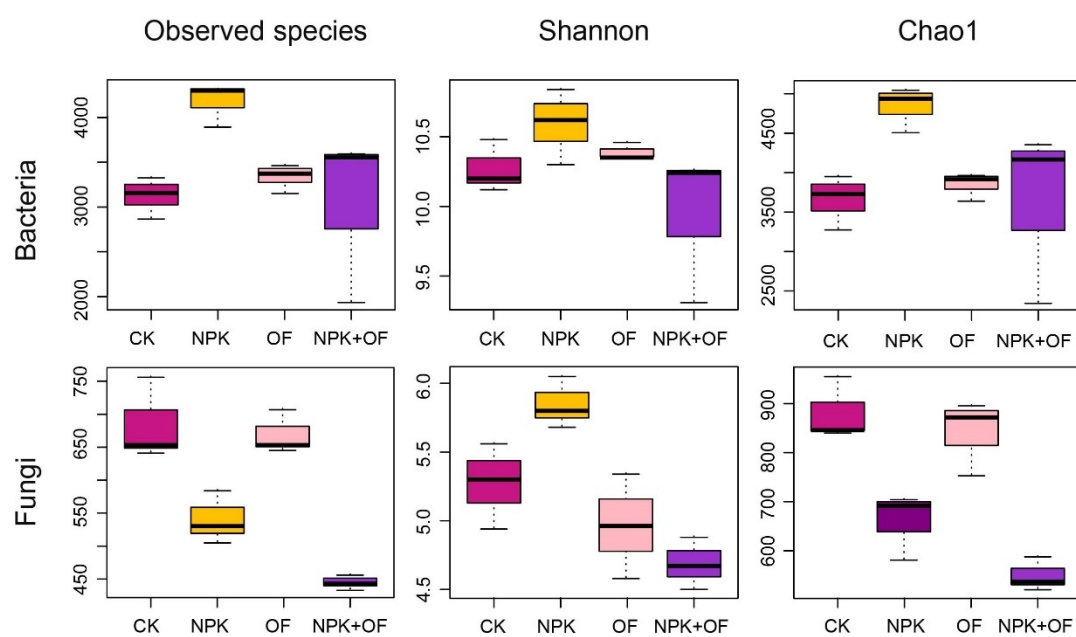

**Figure S3.** Comparison of microbial diversity indices among all four treatments.

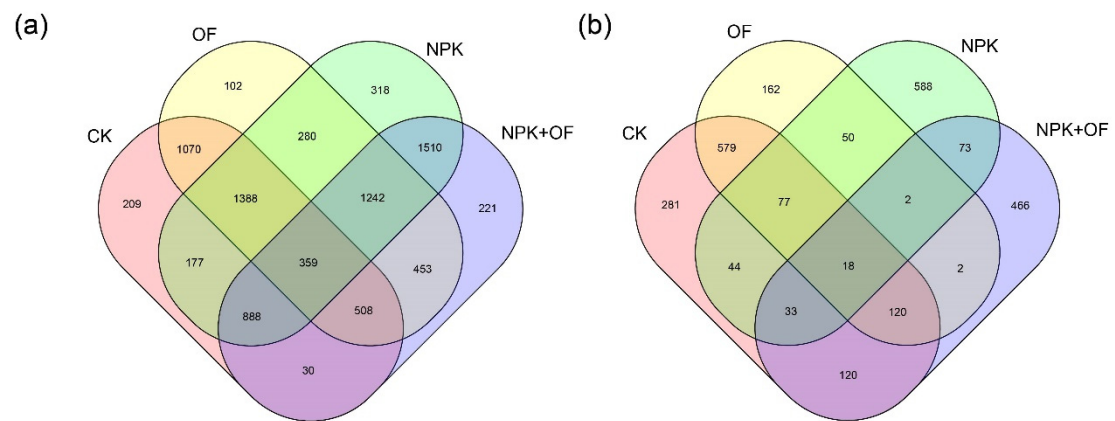

**Figure S4.** Shared and unique OTUs in all treatments for bacteria (a) and fungi (b).

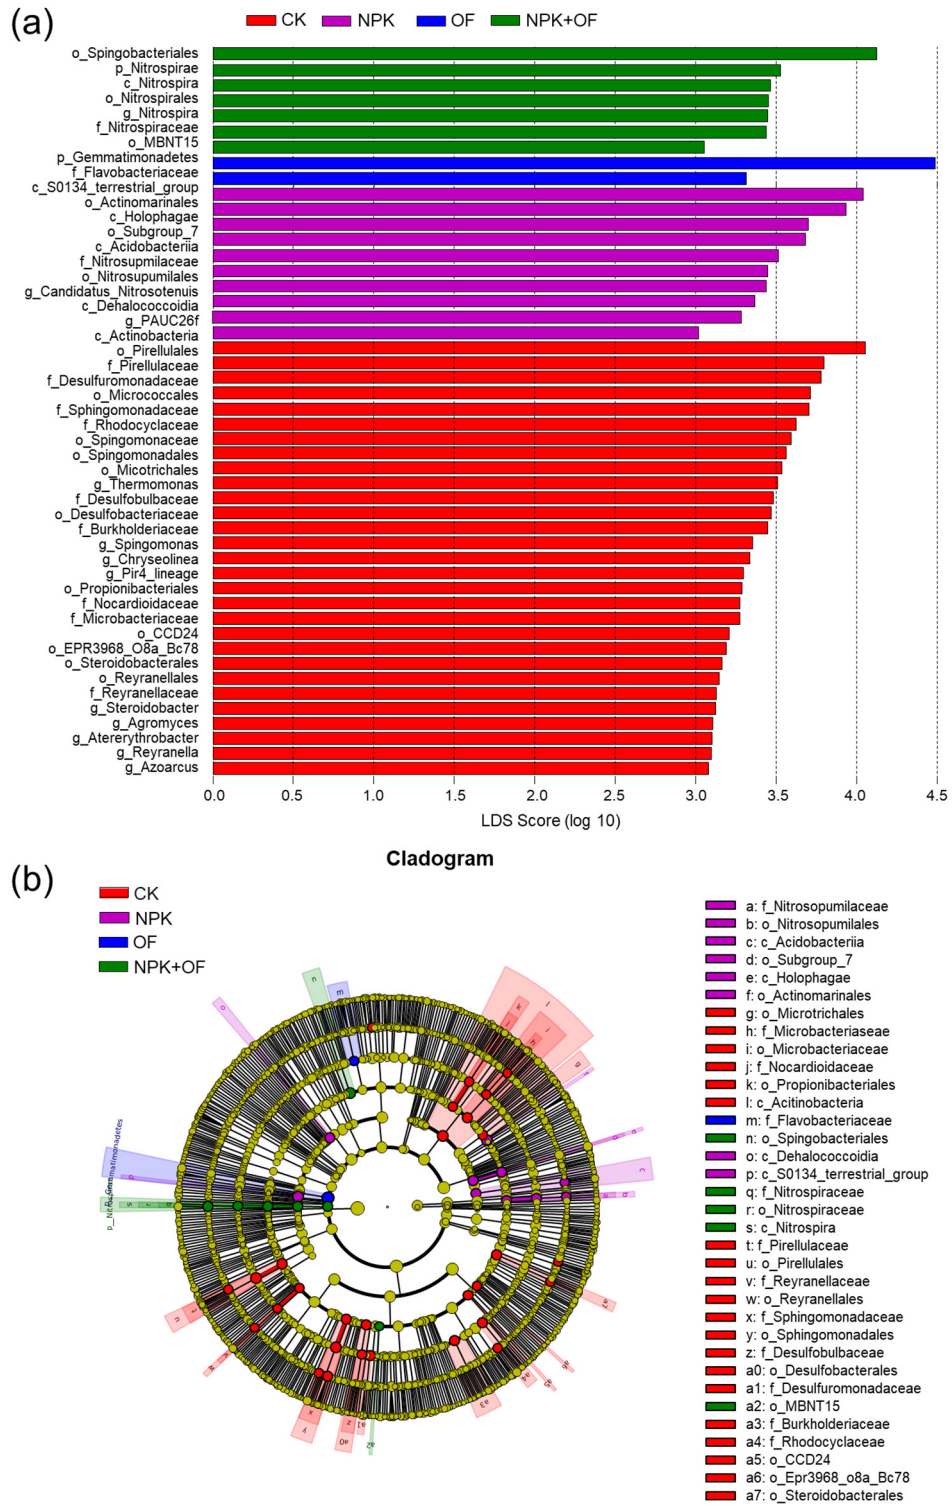

**Figure S5.** Results of LEfSe analysis showing bacterial taxa that significantly differed in the four treatments (a). Cladogram plotted from LEfSe analysis showing the significant differences ( $p < 0.05$ ) in relative abundance of bacterial taxon among four treatments (b).

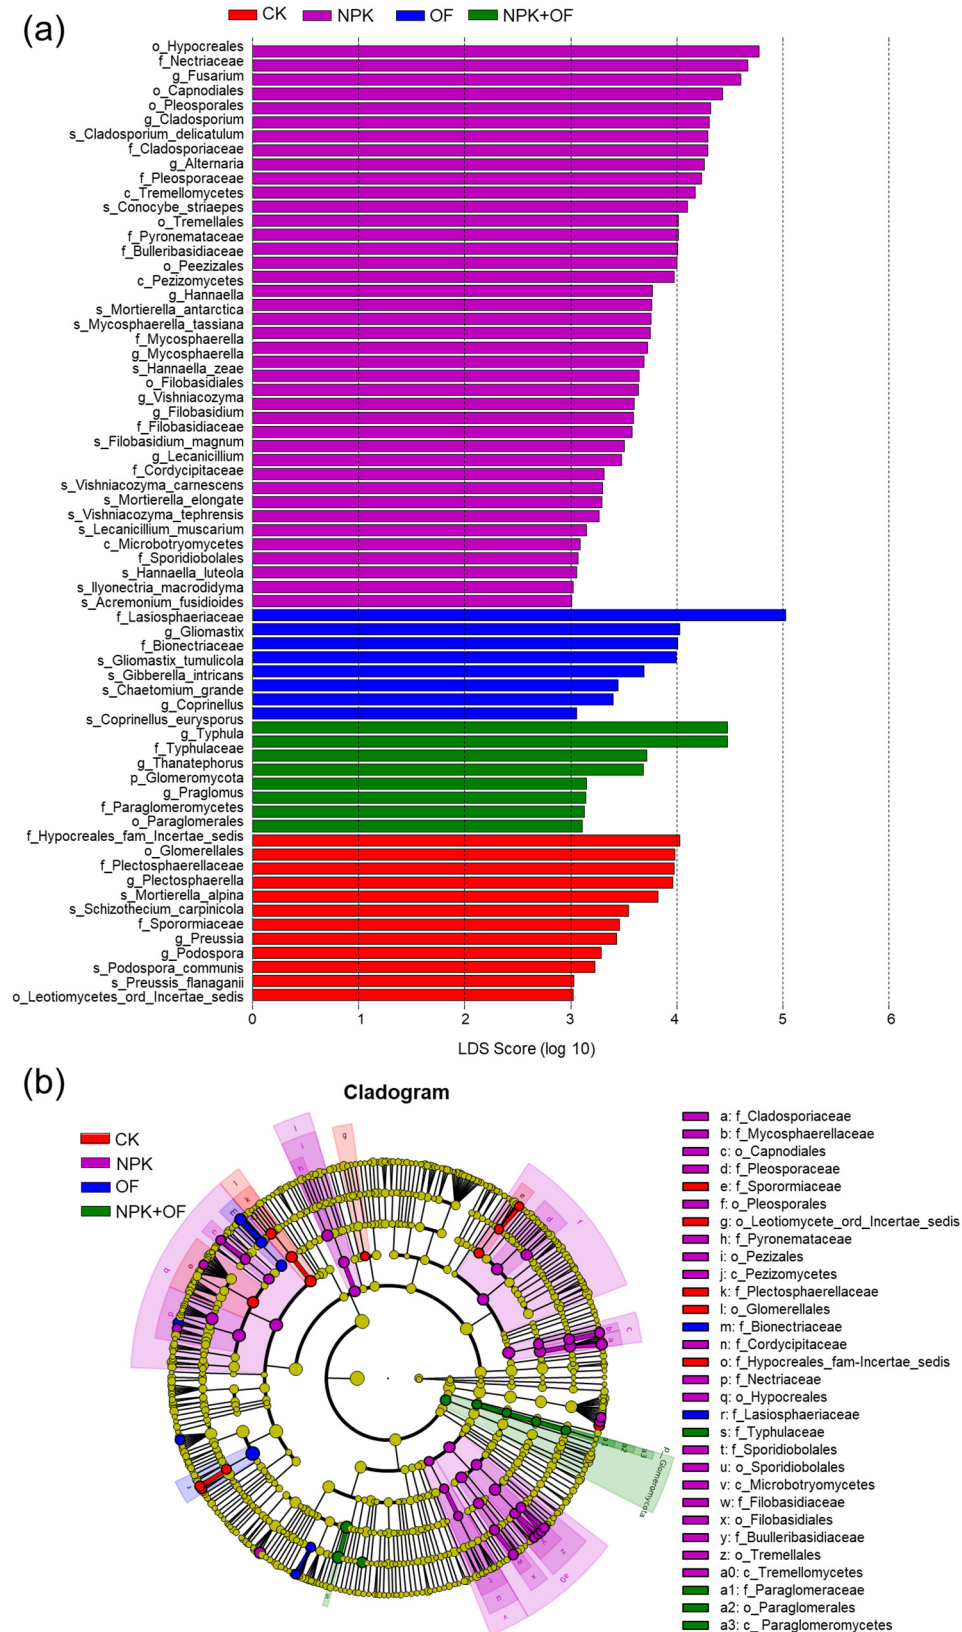

**Figure S6.** Results of LEfSe analysis showing fungal taxa that significantly differed in the four treatments (a). Cladogram plotted from LEfSe analysis showing the significant differences ( $p < 0.05$ ) in relative abundance of fungal taxon among four treatments (b).
